# Supplementary material
Source: PubMed Central journal article supplement (PMC6910161)

**Supplementary Table 1.** NM and SSM collected from participating centers and included in the study

| Center                                | CM collected, n (%) |               |               |               |           |            | CM included |      |       | CM excluded |     |     |
|---------------------------------------|---------------------|---------------|---------------|---------------|-----------|------------|-------------|------|-------|-------------|-----|-----|
|                                       | Total               | NM            | SSM           | LMM           | ALM       | OTHER      | Total       | NM   | SSM   | Total       | NM  | SSM |
| All centers<br>(EADO, Australia, USA) | 25776*              | 5233 (20.3)*  | 15792 (61.3)* | 4751 (18.4)*  |           |            | 20132       | 5062 | 15070 | 893‡        | 171 | 722 |
| EADO<br>(15 European Centers)         | 13243†              | 2451 (18.5) † | 8730 (65.9) † | 2062 (15.6) † |           |            | 10400       | 2324 | 8076  | 781         | 127 | 654 |
| Barcelona, Spain                      | 1163                | 253 (21.8)    | 910 (78.2)    | -             | -         | -          | 1158        | 251  | 907   | 5           | 2   | 3   |
| Bucharest, Romania                    | 786                 | 42 (5.3)      | 176 (22.4)    | 568 (72.3)    |           |            | 195         | 40   | 155   | 23          | 2   | 21  |
| Coimbra, Portugal                     | 197                 | 38 (19.3)     | 98 (49.7)     | 23 (11.7)     | 20 (10.2) | 18 (9.1)   | 109         | 37   | 72    | 27          | 1   | 26  |
| Frankfurt, Germany                    | 972                 | 291 (29.9)    | 473 (48.7)    | 140 (14.4)    | 68 (7.0)  | -          | 744         | 280  | 464   | 20          | 11  | 9   |
| Graz, Austria                         | 66                  | 37 (56.1)     | 29 (43.9)     | -             | -         | -          | 66          | 37   | 29    | 0           | 0   | 0   |
| Sevilla, Spain                        | 550                 | 94 (17.1)     | 257 (46.7)    | 39 (7.1)      | 23 (4.2)  | 137 (24.9) | 292         | 79   | 213   | 59          | 15  | 44  |
| Kiel, Germany                         | 335                 | 53 (15.8)     | 191 (57.0)    | 65 (19.4)     | 18 (5.4)  | 8 (2.4)    | 241         | 52   | 189   | 3           | 1   | 2   |
| Belgrade, Serbia                      | 845                 | 172 (20.4)    | 593 (70.2)    | 21 (2.5)      | 13 (1.5)  | 46 (5.4)   | 696         | 157  | 539   | 69          | 15  | 54  |
| Nantes, France                        | 669                 | 221 (33.0)    | 203 (30.3)    | 57 (8.5)      | 49 (7.3)  | 139 (20.8) | 417         | 220  | 197   | 7           | 1   | 6   |
| Roma, Italy                           | 412                 | 41 (10.0)     | 310 (75.2)    | 16 (3.9)      | 2 (0.0)   | 43 (10.4)  | 144         | 26   | 118   | 207         | 15  | 192 |
| Athens, Greece                        | 773                 | 156 (20.2)    | 505 (65.3)    | 46 (6.0)      | 41 (5.3)  | 25 (3.2)   | 641         | 146  | 495   | 20          | 10  | 10  |
| Tuebingen, Germany                    | 4014                | 611 (15.2)    | 3403 (84.8)   | -             | -         | -          | 3691        | 568  | 3123  | 323         | 43  | 280 |
| Turin, Italy                          | 1231                | 99 (8.0)      | 953 (77.4)    | 47 (3.8)      | 80 (6.5)  | 52 (4.2)   | 1052        | 99   | 953   | 0           | 0   | 0   |

|                       |      |             |             |            |           |             |      |      |      |    |    |    |
|-----------------------|------|-------------|-------------|------------|-----------|-------------|------|------|------|----|----|----|
| Valencia, Spain       | 958  | 191 (19.9)  | 509 (53.1)  | 152 (15.9) | 46 (4.8)  | 60 (6.3)    | 699  | 190  | 509  | 1  | 1  | 0  |
| Zürich, Switzerland   | 272  | 152 (55.9)  | 120 (44.1)  | -          | -         | -           | 255  | 142  | 113  | 17 | 10 | 7  |
| MIA/Sydney, Australia | 8211 | 1878 (22.9) | 4296 (52.3) | 537 (6.5)  | 125 (1.5) | 1375 (16.7) | 6109 | 1861 | 4248 | 65 | 17 | 48 |
| MD Anderson, USA      | 4322 | 904 (20.9)  | 2766 (64.0) | 447 (10.3) | 178 (4.1) | 27 (0.6)    | 3623 | 877  | 2746 | 47 | 27 | 20 |

EADO: European Academy of Dermatologic Oncology, NM: nodular melanoma, SSM: superficial spreading melanoma, LMM: lentigo maligna melanoma, ALM: acral lentiginous melanoma

(-): not available data

\*summary data presented for 12 centers with available data on histological subtypes

†summary data presented for 10 centers with available data on histological subtypes

‡ Excluded: 20 cases with multiple primary melanomas (non-index cases), 188 cases with missing Breslow thickness or diagnosed as *in situ* melanomas, 465 cases with a date of diagnosis before 2006 or after 2015, 82 patients with missing age or age<16 years and 138 cases with missing values in all variables

**Supplementary Table 2.** Clinical and histological characteristics by Breslow thickness T1, T2, T3, T4 for NM and SSM from all centers (n=20132)

| <b>ALL NM (n=5062)</b>                   |                             |                                 |                                 |                                 |                           |                |
|------------------------------------------|-----------------------------|---------------------------------|---------------------------------|---------------------------------|---------------------------|----------------|
| <b>Variable</b>                          | <b>Breslow thickness</b>    |                                 |                                 |                                 |                           | <b>p-value</b> |
|                                          | <b>T1: ≤1.0<br/>(n=297)</b> | <b>T2: 1.1-2.0<br/>(n=1082)</b> | <b>T3: 2.1-4.0<br/>(n=1823)</b> | <b>T4: &gt;4.0<br/>(n=1860)</b> | <b>Total<br/>(n=5062)</b> |                |
| Age (years), median (IQR)                | 54.4 (43.0, 66.1)           | 58.4 (47.3, 69.0)               | 63.4 (50.0, 74.9)               | 65.8 (54.0, 76.6)               | 62.8 (50.1, 73.9)         | <0.001*        |
| Age, n (%)                               |                             |                                 |                                 |                                 |                           |                |
| ≤ 50 years                               | 118 (39.7)                  | 325 (30.0)                      | 457 (25.1)                      | 353 (19.0)                      | 1253 (24.8)               | <0.001†        |
| >50 years                                | 179 (60.3)                  | 757 (70.0)                      | 1366 (74.9)                     | 1507 (81.0)                     | 3809 (75.2)               |                |
| Gender, n (%)                            |                             |                                 |                                 |                                 |                           |                |
| Male                                     | 155 (52.2)                  | 599 (55.4)                      | 1111 (60.9)                     | 1186 (63.8)                     | 3051 (60.3)               | <0.001†        |
| Female                                   | 142 (47.8)                  | 483 (44.6)                      | 712 (39.1)                      | 674 (36.2)                      | 2011 (39.7)               |                |
| Anatomic site of melanoma, n (%)         |                             |                                 |                                 |                                 |                           |                |
| head/neck                                | 52 (17.7)                   | 162 (15.1)                      | 386 (21.4)                      | 442 (24.1)                      | 1042 (20.8)               | <0.001†        |
| trunk                                    | 102 (34.7)                  | 395 (36.8)                      | 659 (36.5)                      | 686 (37.4)                      | 1842 (36.8)               |                |
| upper extremities                        | 74 (25.2)                   | 263 (24.5)                      | 369 (20.4)                      | 332 (18.1)                      | 1038 (20.7)               |                |
| lower extremities                        | 66 (22.4)                   | 253 (23.6)                      | 391 (21.7)                      | 372 (20.3)                      | 1082 (21.6)               |                |
| Breslow thickness (mm), median (IQR)     | 0.9 (0.7, 1.0)              | 1.6 (1.3, 1.8)                  | 2.9 (2.5, 3.5)                  | 6.1 (5.0, 9.0)                  | 3.1 (2.0, 5.2)            | <0.001*        |
| Ulceration, n (%)                        |                             |                                 |                                 |                                 |                           |                |
| present                                  | 33 (11.7)                   | 272 (26.7)                      | 869 (49.6)                      | 1196 (67.2)                     | 2370 (49.0)               | <0.001†        |
| absent                                   | 250 (88.3)                  | 745 (73.3)                      | 884 (50.4)                      | 585 (32.8)                      | 2464 (51.0)               |                |
| Regression, n (%)                        |                             |                                 |                                 |                                 |                           |                |
| present                                  | 41 (15.9)                   | 98 (10.6)                       | 144 (9.0)                       | 137 (8.8)                       | 420 (9.7)                 | 0.002†         |
| absent                                   | 217 (84.1)                  | 830 (89.4)                      | 1448 (91.0)                     | 1423 (91.2)                     | 3918 (90.3)               |                |
| Nevus remnants, n (%)                    |                             |                                 |                                 |                                 |                           |                |
| present                                  | 68 (29.2)                   | 190 (23.5)                      | 228 (17.1)                      | 141 (10.8)                      | 627 (17.0)                | <0.001†        |
| absent                                   | 165 (70.8)                  | 617 (76.5)                      | 1109 (82.9)                     | 1160 (89.2)                     | 3051 (83.0)               |                |
| Mitoses, n (%)                           |                             |                                 |                                 |                                 |                           |                |
| present                                  | 186 (76.9)                  | 750 (93.1)                      | 1312 (96.4)                     | 1368 (97.7)                     | 3616 (94.9)               | <0.001†        |
| absent                                   | 56 (23.1)                   | 56 (6.9)                        | 49 (3.6)                        | 32 (2.3)                        | 193 (5.1)                 |                |
| Tumour spread (initial diagnosis), n (%) |                             |                                 |                                 |                                 |                           |                |
| localized                                | 212 (86.5)                  | 765 (80.2)                      | 1170 (72.9)                     | 919 (57.8)                      | 3066 (69.8)               | <0.001†        |
| satellite-/intransit metastasis          | 5 (2.0)                     | 53 (5.6)                        | 121 (7.5)                       | 164 (10.3)                      | 343 (7.8)                 |                |
| regional lymph node metastasis           | 21 (8.6)                    | 123 (12.9)                      | 278 (17.3)                      | 394 (24.8)                      | 816 (18.6)                |                |
| distant metastasis                       | 7 (2.9)                     | 13 (1.4)                        | 37 (2.3)                        | 113 (7.1)                       | 170 (3.9)                 |                |
| <b>ALL SSM (n=15070)</b>                 |                             |                                 |                                 |                                 |                           |                |

| Variable                                 | Breslow thickness    |                         |                         |                     |                    | p-value |
|------------------------------------------|----------------------|-------------------------|-------------------------|---------------------|--------------------|---------|
|                                          | T1: ≤1.0<br>(n=9384) | T2: 1.1-2.0<br>(n=3484) | T3: 2.1-4.0<br>(n=1547) | T4: >4.0<br>(n=655) | Total<br>(n=15070) |         |
| Age, years, median (IQR)                 | 53.7 (42.4, 65.0)    | 57.7 (46.0, 68.5)       | 61.4 (48.8, 72.3)       | 62.3 (49.0, 73.5)   | 55.8 (44.1, 67.1)  | <0.001* |
| Age, n (%)                               |                      |                         |                         |                     |                    |         |
| ≤ 50 years                               | 3878 (41.3)          | 1186 (34.0)             | 419 (27.1)              | 173 (26.4)          | 5656 (37.5)        | <0.001† |
| >50 years                                | 5506 (58.7)          | 2298 (66.0)             | 1128 (72.9)             | 482 (73.6)          | 9414 (62.5)        |         |
| Gender, n (%)                            |                      |                         |                         |                     |                    |         |
| Male                                     | 4624 (49.3)          | 1906 (54.7)             | 925 (59.8)              | 425 (64.9)          | 7880 (52.3)        | <0.001† |
| Female                                   | 4760 (50.7)          | 1578 (45.3)             | 622 (40.2)              | 230 (35.1)          | 7190 (47.7)        |         |
| Anatomic site of melanoma, n (%)         |                      |                         |                         |                     |                    |         |
| head/neck                                | 898 (9.6)            | 364 (10.6)              | 206 (13.6)              | 121 (19.0)          | 1589 (10.7)        | <0.001† |
| trunk                                    | 4270 (45.8)          | 1499 (43.7)             | 674 (44.4)              | 291 (45.7)          | 6734 (45.2)        |         |
| upper extremities                        | 1883 (20.2)          | 668 (19.5)              | 253 (16.7)              | 75 (11.8)           | 2879 (19.3)        |         |
| lower extremities                        | 2262 (24.3)          | 902 (26.3)              | 386 (25.4)              | 150 (23.5)          | 3700 (24.8)        |         |
| Breslow thickness (mm), median (IQR)     | 0.6 (0.4, 0.8)       | 1.4 (1.2, 1.7)          | 2.7 (2.3, 3.2)          | 5.5 (4.8, 7.0)      | 0.8 (0.5, 1.4)     | <0.001* |
| Ulceration, n (%)                        |                      |                         |                         |                     |                    |         |
| present                                  | 338 (3.8)            | 549 (16.5)              | 670 (44.9)              | 419 (66.6)          | 1976 (13.7)        | <0.001† |
| absent                                   | 8616 (96.2)          | 2773 (83.5)             | 823 (55.1)              | 210 (33.4)          | 12422 (86.3)       |         |
| Regression, n (%)                        |                      |                         |                         |                     |                    |         |
| present                                  | 2631 (31.1)          | 744 (23.9)              | 282 (20.9)              | 125 (23.8)          | 3782 (28.1)        | <0.001† |
| absent                                   | 5819 (68.9)          | 2368 (76.1)             | 1069 (79.1)             | 401 (76.2)          | 9657 (71.9)        |         |
| Nevus remnants, n (%)                    |                      |                         |                         |                     |                    |         |
| present                                  | 2762 (38.8)          | 881 (35.2)              | 285 (25.7)              | 86 (20.7)           | 4014 (36.0)        | <0.001† |
| absent                                   | 4362 (61.2)          | 1623 (64.8)             | 825 (74.3)              | 330 (79.3)          | 7140 (64.0)        |         |
| Mitoses, n (%)                           |                      |                         |                         |                     |                    |         |
| present                                  | 2737 (45.8)          | 2123 (86.6)             | 1067 (96.6)             | 457 (97.2)          | 6384 (63.9)        | <0.001† |
| absent                                   | 3234 (54.2)          | 329 (13.4)              | 37 (3.4)                | 13 (2.8)            | 3613 (36.1)        |         |
| Tumour spread (initial diagnosis), n (%) |                      |                         |                         |                     |                    |         |
| localized                                | 7963 (95.4)          | 2611 (82.6)             | 938 (67.5)              | 290 (48.5)          | 11802 (87.5)       | <0.001† |
| satellite-/intransit metastasis          | 52 (0.6)             | 122 (3.9)               | 100 (7.2)               | 50 (8.4)            | 324 (2.4)          |         |
| regional lymph node metastasis           | 299 (3.6)            | 403 (12.7)              | 333 (24.0)              | 233 (39.0)          | 1268 (9.4)         |         |
| distant metastasis                       | 29 (0.3)             | 26 (0.8)                | 18 (1.3)                | 25 (4.2)            | 98 (0.7)           |         |

\*P value was calculated using a two-sided Kruskal Wallis test, †P value was calculated using a two-sided chi-squared test.

**Supplementary Table 3.** Multivariate logistic regression analysis of the characteristics of NM compared to SSM stratified by T3, T4 Breslow thickness

| Variable                         | Breslow thickness       |          |                      |          |
|----------------------------------|-------------------------|----------|----------------------|----------|
|                                  | T3: 2.1-4.0 mm (n=1726) |          | T4: >4.0 mm (n=1216) |          |
|                                  | OR (95% CI)             | p-value* | OR (95% CI)          | p-value* |
| Gender                           |                         |          |                      |          |
| female                           | Ref                     |          | Ref                  |          |
| male                             | 1.02 (0.82, 1.27)       | 0.85     | 0.88 (0.65, 1.20)    | 0.42     |
| Age, years                       |                         |          |                      |          |
| ≤50                              | Ref                     |          | Ref                  |          |
| >50                              | 0.87 (0.69, 1.09)       | 0.22     | 1.10 (0.78, 1.55)    | 0.59     |
| Log Breslow thickness, mm        | 3.55 (2.13, 5.91)       | <0.001   | 2.04 (1.41, 2.95)    | <0.001   |
| Anatomic site                    |                         |          |                      |          |
| lower extremities                | Ref                     |          | Ref                  |          |
| head/neck                        | 1.31 (0.95, 1.80)       | 0.10     | 1.10 (0.73, 1.67)    | 0.64     |
| trunk                            | 1.00 (0.76, 1.31)       | 0.97     | 1.06 (0.73, 1.55)    | 0.75     |
| upper extremities                | 1.47 (1.07, 2.00)       | 0.02     | 1.81 (1.10, 2.95)    | 0.02     |
| Ulceration                       |                         |          |                      |          |
| absent                           | Ref                     |          | Ref                  |          |
| present                          | 1.12 (0.92, 1.37)       | 0.25     | 0.71 (0.53, 0.96)    | 0.03     |
| Regression                       |                         |          |                      |          |
| absent                           | Ref                     |          | Ref                  |          |
| present                          | 0.47 (0.35, 0.61)       | <0.001   | 0.38 (0.26, 0.54)    | <0.001   |
| Nevus remnants                   |                         |          |                      |          |
| absent                           | Ref                     |          | Ref                  |          |
| present                          | 0.61 (0.48, 0.78)       | <0.001   | 0.47 (0.33, 0.68)    | <0.001   |
| Mitoses                          |                         |          |                      |          |
| absent                           | Ref                     |          | Ref                  |          |
| present                          | 0.69 (0.36, 1.33)       | 0.27     | 1.57 (0.69, 3.59)    | 0.28     |
| Tumor spread (initial diagnosis) |                         |          |                      |          |
| localized                        | Ref                     |          | Ref                  |          |
| regional metastasis              | 0.64 (0.52, 0.80)       | <0.001   | 0.49 (0.36, 0.65)    | <0.001   |
| distant metastasis               | 1.07 (0.49, 2.33)       | 0.87     | 1.01 (0.53, 1.94)    | 0.98     |

Multivariate analysis adjusted for all variables included in Table.

\* All statistical tests are two-sided.

**Supplementary Table 4.** Multivariate logistic regression analysis of the characteristics of NM compared to SSM stratified by T1, T2 Breslow thickness for localized melanomas

|                           | <b>Breslow thickness</b>   |                 |                                |                 |
|---------------------------|----------------------------|-----------------|--------------------------------|-----------------|
|                           | <b>T1: ≤ 1 mm (n=4044)</b> |                 | <b>T2: 1.1-2.0 mm (n=1764)</b> |                 |
| <b>Variable</b>           | <b>OR (95% CI)</b>         | <b>p-value*</b> | <b>OR (95% CI)</b>             | <b>p-value*</b> |
| Gender                    |                            |                 |                                |                 |
| female                    | Ref                        |                 | Ref                            |                 |
| male                      | 1.35 (0.93, 1.95)          | 0.11            | 1.13 (0.89, 1.43)              | 0.32            |
| Age, years                |                            |                 |                                |                 |
| ≤50                       | Ref                        |                 | Ref                            |                 |
| >50                       | 0.99 (0.68, 1.42)          | 0.93            | 0.95 (0.74, 1.23)              | 0.72            |
| Log Breslow thickness, mm | 22.53 (10.23, 49.60)       | <0.001          | 7.18 (4.00, 12.91)             | <0.001          |
| Anatomic site             |                            |                 |                                |                 |
| lower extremities         | Ref                        |                 | Ref                            |                 |
| head/neck                 | 1.81 (1.02, 3.22)          | 0.04            | 1.52 (1.03, 2.22)              | 0.03            |
| trunk                     | 1.03 (0.63, 1.68)          | 0.92            | 1.14 (0.83, 1.55)              | 0.42            |
| upper extremities         | 1.16 (0.69, 1.93)          | 0.58            | 1.51 (1.10, 2.06)              | 0.01            |
| Ulceration                |                            |                 |                                |                 |
| absent                    | Ref                        |                 | Ref                            |                 |
| present                   | 1.18 (0.62, 2.26)          | 0.609           | 1.19 (0.90, 1.58)              | 0.225           |
| Regression                |                            |                 |                                |                 |
| absent                    | Ref                        |                 | Ref                            |                 |
| present                   | 0.45 (0.27, 0.74)          | 0.002           | 0.47 (0.34, 0.64)              | <0.001          |
| Nevus remnants            |                            |                 |                                |                 |
| absent                    | Ref                        |                 | Ref                            |                 |
| present                   | 0.62 (0.43, 0.90)          | 0.01            | 0.56 (0.44, 0.72)              | <0.001          |
| Mitoses                   |                            |                 |                                |                 |
| absent                    | Ref                        |                 | Ref                            |                 |
| present                   | 1.97 (1.29, 3.02)          | 0.002           | 2.60 (1.62, 4.17)              | <0.001          |

Multivariate analysis adjusted for all variables included in Table.

\*All statistical tests are two-sided.

**Supplementary Table 5.** In localized melanomas: Mitotic rate for NM (median and adjusted geometric mean) compared with SSM stratified for T1, T2, T3 and T4 melanomas. Normal regression analysis restricted to cases from MD Anderson and MIA/Sydney

|                            | Mitotic rate per mm <sup>2</sup> |                                                               |      |                                                               |           |
|----------------------------|----------------------------------|---------------------------------------------------------------|------|---------------------------------------------------------------|-----------|
|                            | NM                               |                                                               | SSM  |                                                               | p-value*† |
|                            | n                                | GM* (95% CI)<br>Median (25 <sup>th</sup> , 75 <sup>th</sup> ) | n    | GM* (95% CI)<br>Median (25 <sup>th</sup> , 75 <sup>th</sup> ) |           |
| <b>Breslow thickness</b>   |                                  |                                                               |      |                                                               |           |
| T1: ≤1.0 mm<br>(n=1531)    | 107                              | 2.1 (1.9, 2.4)<br>2.0 (1.0, 3.0)                              | 1424 | 1.5 (1.5, 1.6)<br>0.0 (0.0, 1.0)                              | <0.001    |
| T2: 1.1-2.0 mm<br>(n=1428) | 411                              | 3.1 (2.8, 3.4)<br>3.0 (2.0, 5.0)                              | 1017 | 2.5 (2.3, 2.8)<br>2.0 (1.0, 5.0)                              | <0.001    |
| T3: 2.1-4.0 mm<br>(n=1051) | 615                              | 4.3 (3.8, 4.9)<br>6.0 (3.0, 10.0)                             | 436  | 3.7 (3.2, 4.3)<br>5.0 (3.0, 9.0)                              | 0.003     |
| T4: >4.0 mm<br>(n=528)     | 435                              | 6.5 (5.1, 8.4)<br>9.0 (5.0, 15.0)                             | 93   | 5.9 (4.3, 8.0)<br>10.0 (5.0, 14.0)                            | 0.27      |

GM: geometric mean, CI: confidence intervals

\*Normal regression analysis adjusted for gender, age, ulceration

†All statistical tests are two-sided.

**Supplementary Table 6.** Five -year melanoma specific survival (MSS) rates and associated prognostic factors in univariate Kaplan-Meier analysis

| Variable               |       |                 | Melanoma-specific survival rate, % |           |
|------------------------|-------|-----------------|------------------------------------|-----------|
|                        | N     | Melanoma deaths | 5-Year (95% CI)                    | p-value # |
| All melanomas          | 18373 | 1567            | 86.9 (86.2, 87.6)                  |           |
| Histological subtype   |       |                 |                                    |           |
| SSM                    | 13726 | 800             | 91.0 (90.3, 91.6)                  | <0.001    |
| NM                     | 4647  | 767             | 75.4 (73.6, 77.1)                  |           |
| Year at diagnosis      |       |                 |                                    |           |
| 2006-2010              | 9252  | 1035            | 87.0 (86.2, 87.8)                  | 0.37      |
| 2011-2015              | 9121  | 532             | 86.6 (85.2, 88.0)                  |           |
| Age, years             |       |                 |                                    |           |
| ≤ 50                   | 6673  | 475             | 89.8 (88.7, 90.7)                  | <0.001    |
| 51-60                  | 3600  | 281             | 88.6 (87.0, 89.9)                  |           |
| 60-69                  | 3950  | 358             | 86.1 (84.5, 87.5)                  |           |
| ≥70                    | 4150  | 453             | 80.6 (78.7, 82.3)                  |           |
| Gender                 |       |                 |                                    |           |
| Female                 | 8333  | 549             | 90.2 (89.3, 91.1)                  | <0.001    |
| Male                   | 10040 | 1018            | 84.1 (83.1, 85.1)                  |           |
| Anatomical site *      |       |                 |                                    |           |
| head/neck              | 2451  | 299             | 79.5 (77.1, 81.7)                  | <0.001    |
| trunk                  | 7880  | 706             | 86.7 (85.6, 87.7)                  |           |
| upper extremities      | 3560  | 204             | 91.1 (89.7, 92.4)                  |           |
| lower extremities      | 4347  | 334             | 88.5 (87.1, 89.8)                  |           |
| Breslow thickness (mm) |       |                 |                                    |           |
| ≤1.0                   | 8748  | 202             | 96.4 (95.8, 97.0)                  | <0.001    |
| 1.1-2.0                | 4170  | 320             | 89.0 (87.6, 90.3)                  |           |
| 2.1-4.0                | 3135  | 455             | 78.2 (76.2, 80.1)                  |           |
| >4.0                   | 2320  | 590             | 61.8 (59.0, 64.6)                  |           |
| Ulceration †           |       |                 |                                    |           |
| absent                 | 13600 | 717             | 91.7 (91.1, 92.4)                  | <0.001    |
| present                | 4000  | 766             | 71.6 (69.6, 73.5)                  |           |
| Regression ‡           |       |                 |                                    |           |
| absent                 | 12465 | 1062            | 87.0 (86.1, 87.8)                  | <0.001    |
| present                | 3767  | 218             | 90.9 (89.5, 92.3)                  |           |
| Nevus remnants §       |       |                 |                                    |           |
| absent                 | 9689  | 849             | 86.8 (85.9, 87.7)                  | <0.001    |
| present                | 4300  | 256             | 90.6 (89.2, 91.7)                  |           |
| Mitoses                |       |                 |                                    |           |
| absent                 | 3322  | 54              | 96.9 (95.9, 97.8)                  | <0.001    |
| present                | 9204  | 1045            | 82.0 (80.9, 83.1)                  |           |



|                               |       |     |                   |        |
|-------------------------------|-------|-----|-------------------|--------|
| Tumor spread (at diagnosis) † |       |     |                   |        |
| Localized                     | 13463 | 617 | 92.8 (92.1, 93.4) | <0.001 |
| Regional metastasis           | 2674  | 635 | 67.5 (65.1, 69.8) |        |
| Distant metastasis            | 257   | 119 | 33.4 (25.2, 41.8) |        |
| Region                        |       |     |                   |        |
| EADO                          | 9228  | 812 | 87.4 (86.5, 88.3) | <0.001 |
| MIA/Sydney                    | 5553  | 461 | 84.1 (82.5, 85.6) |        |
| Region                        |       |     |                   |        |
| EADO                          | 9228  | 812 | 87.4 (86.5, 88.3) | 0.13   |
| MD Anderson, USA              | 3592  | 294 | 88.4 (87.0, 89.8) |        |

\* 135 missing values, † 773 missing values, ‡ 2141 missing values, § 4384 missing values, || 5847 missing values, ¶ 1979 missing values, #P-values were calculated using a two-sided long-rank test

**Supplementary Table 7.** Cox Proportional Hazard Models comparisons according to AIC and BIC criterion

|                                                                       | <b>T1</b>  |            | <b>T2</b>  |            | <b>T3</b>  |            | <b>T4</b>  |            |
|-----------------------------------------------------------------------|------------|------------|------------|------------|------------|------------|------------|------------|
| Cox regression models                                                 | <b>AIC</b> | <b>BIC</b> | <b>AIC</b> | <b>BIC</b> | <b>AIC</b> | <b>BIC</b> | <b>AIC</b> | <b>BIC</b> |
| <b>All cases</b>                                                      |            |            |            |            |            |            |            |            |
| Multivariate 2 (adjusted for age, sex, Breslow thickness, ulceration) | 3036.941   | 3086.168   | 4321.371   | 4365.389   | 6286.222   | 6328.32    | 7839.198   | 7879.166   |
| Multivariate 2 with frailty for center                                | 3016.431   | 3065.658   | 4298.707   | 4342.725   | 6250.082   | 6292.18    | 7817.814   | 7857.782   |
| <b>Stratified: localized melanomas</b>                                |            |            |            |            |            |            |            |            |
| Multivariate 2 (adjusted for age, sex, Breslow thickness, ulceration) | 1790.649   | 1838.765   | 1919.922   | 1961.763   | 2304.208   | 2342.996   | 1892.203   | 1926.939   |
| Multivariate 2 with frailty for center                                | 1782.961   | 1831.077   | 1896.406   | 1938.247   | 2267.966   | 2306.754   | 1864.944   | 1899.68    |

AIC: Akaike Information Criterion, BIC: Bayesian Information Criterion

**Supplementary Figure 1. Kaplan-Meier plots for melanoma-specific survival rates for NM compared to SSM.** A. for all cases with known survival (n=18373) (p<0.001), B. for T1 (n=8748), (p < 0.001), C. for T2 (p=0.009), D. for T3/T4 melanomas (p=0.15). P values were calculated by a two-sided log-rank test. Shaded areas indicate 95% confidence intervals. Dashed line indicates 5-year rates.

A.

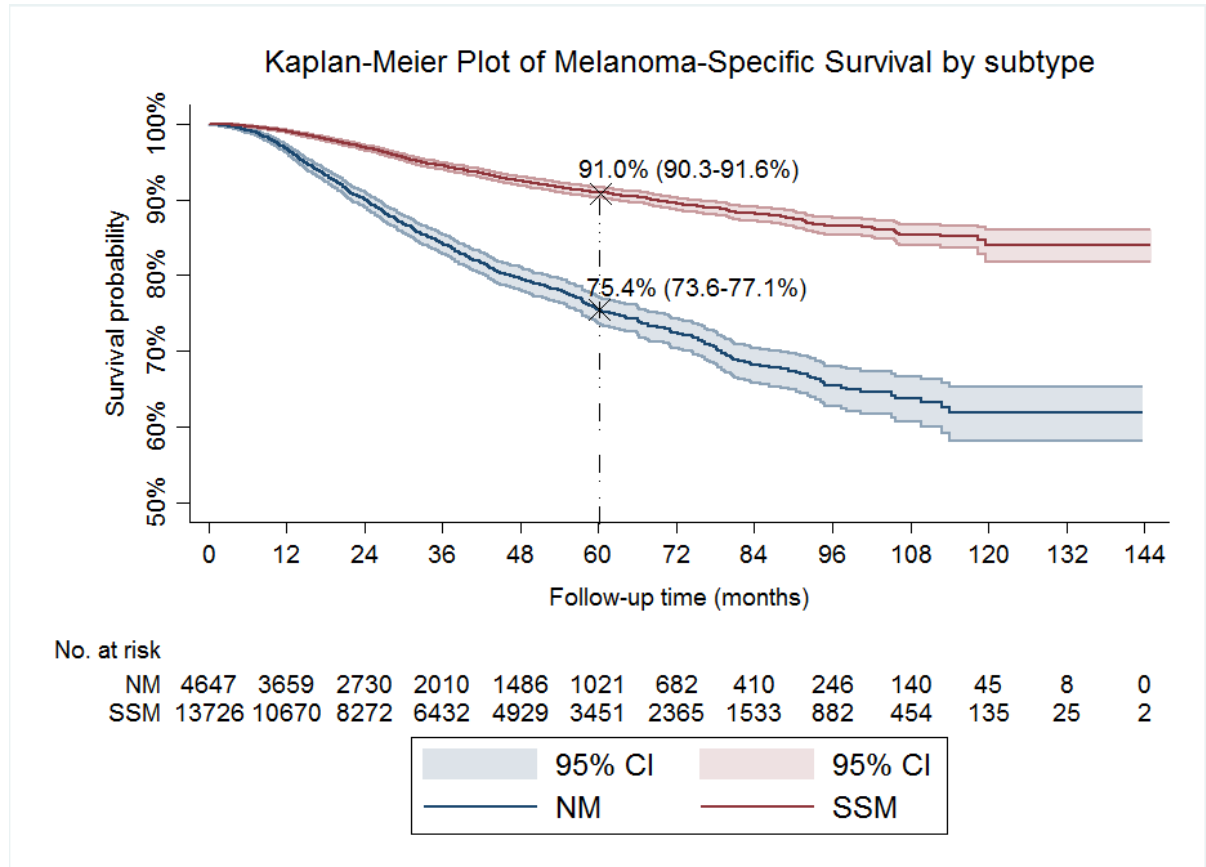

B.

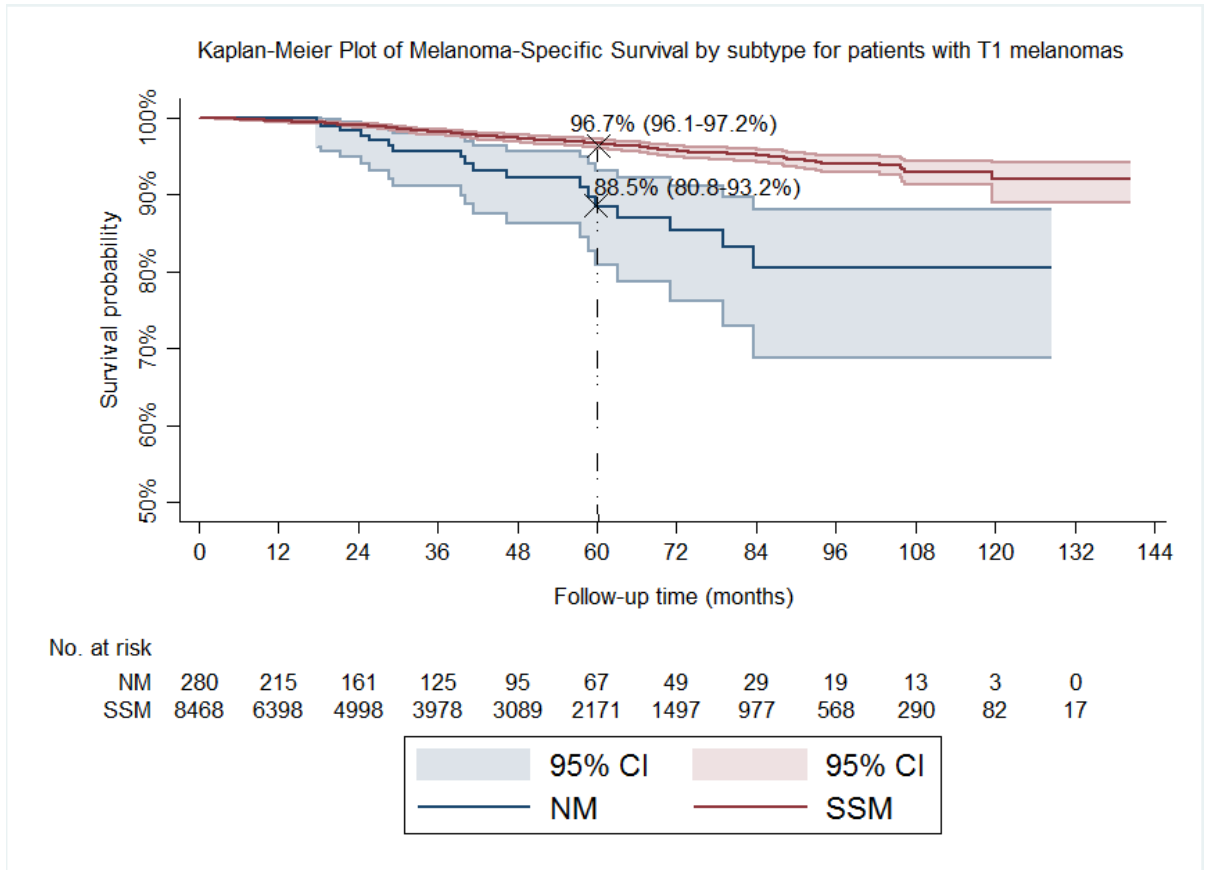

C.

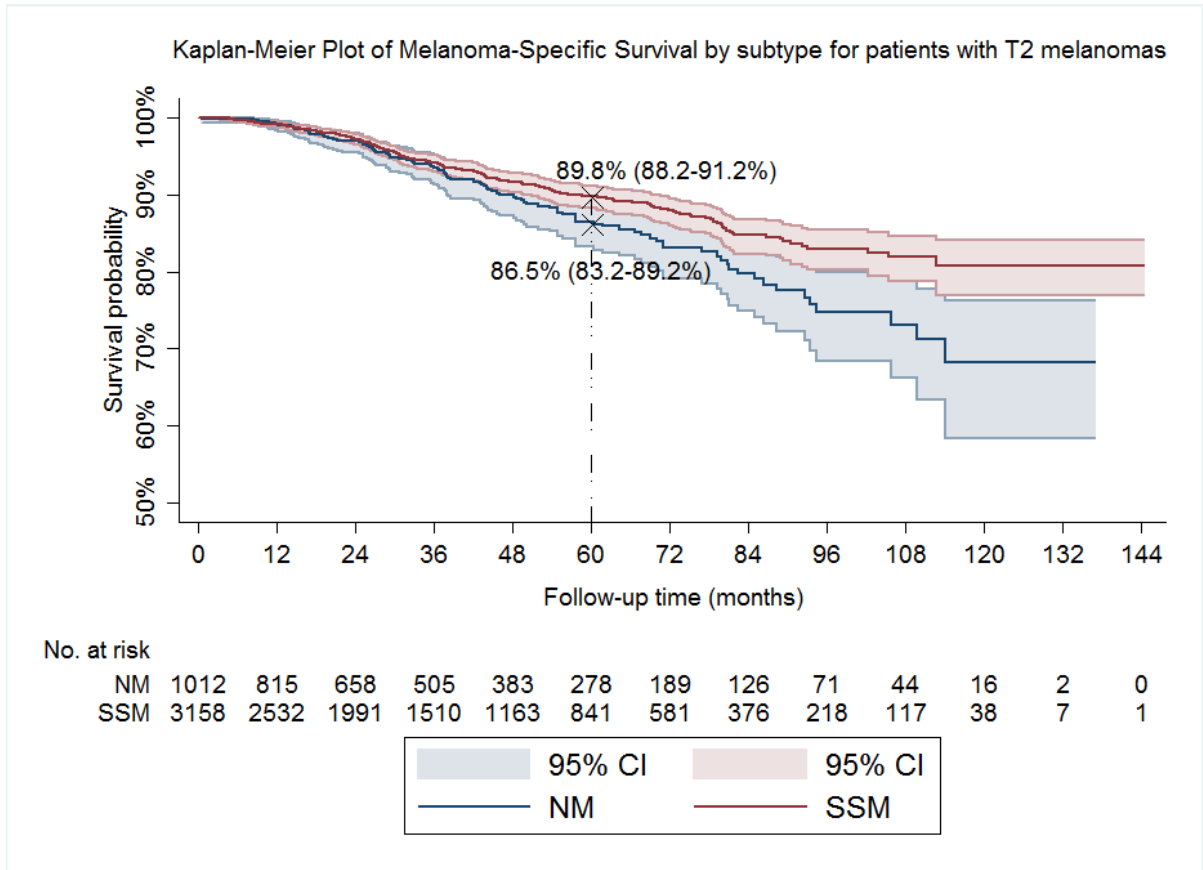

D.

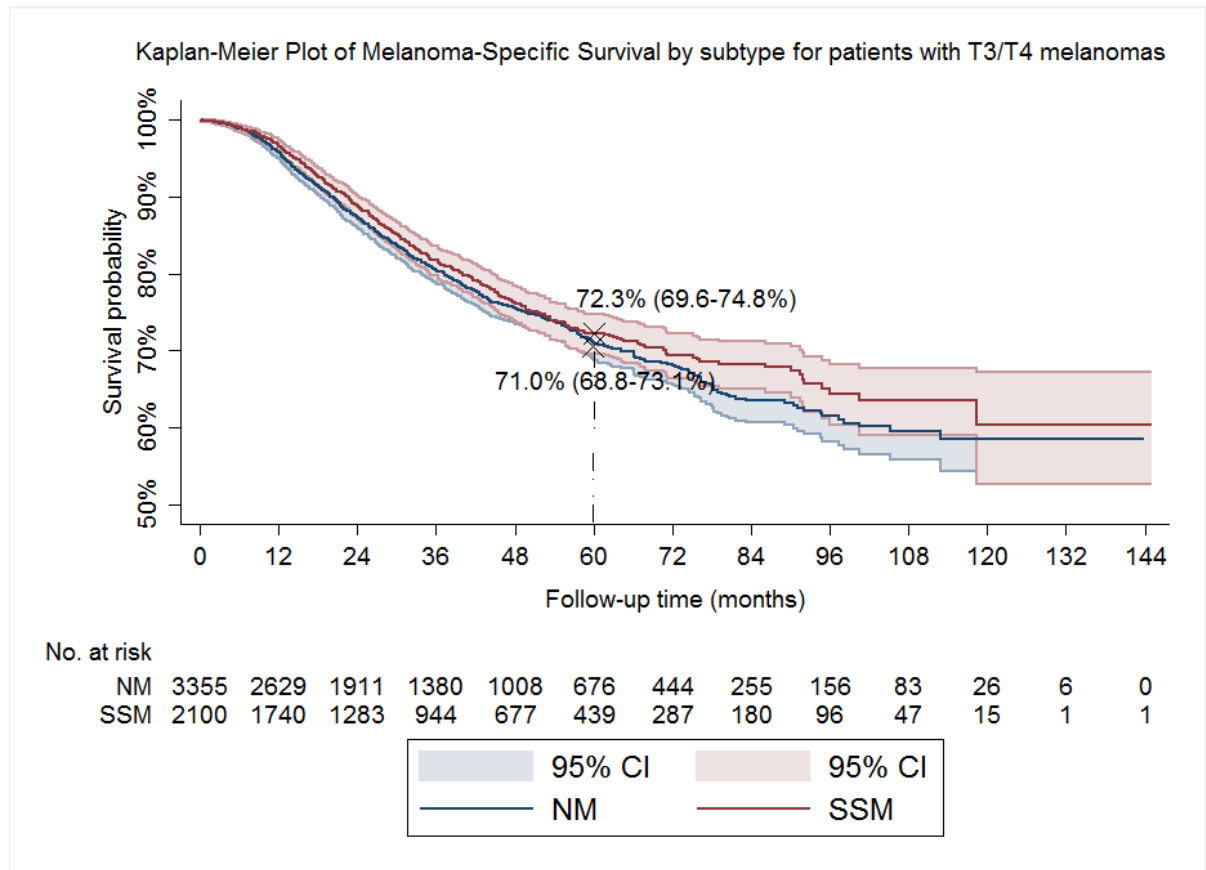

**Supplementary Figure 2.** Kaplan-Meier plots for melanoma-specific survival rates for NM compared to SSM in T1 melanomas by thickness at 0.8 mm  
 A. for thickness <0.8 mm (p=0.01), B. for thickness 0.8-1.00 mm (p=0.006).  
 P values were calculated using a two-sided log-rank test. Shaded areas indicate 95% confidence intervals. Dashed line indicates 5-year rates.

A.

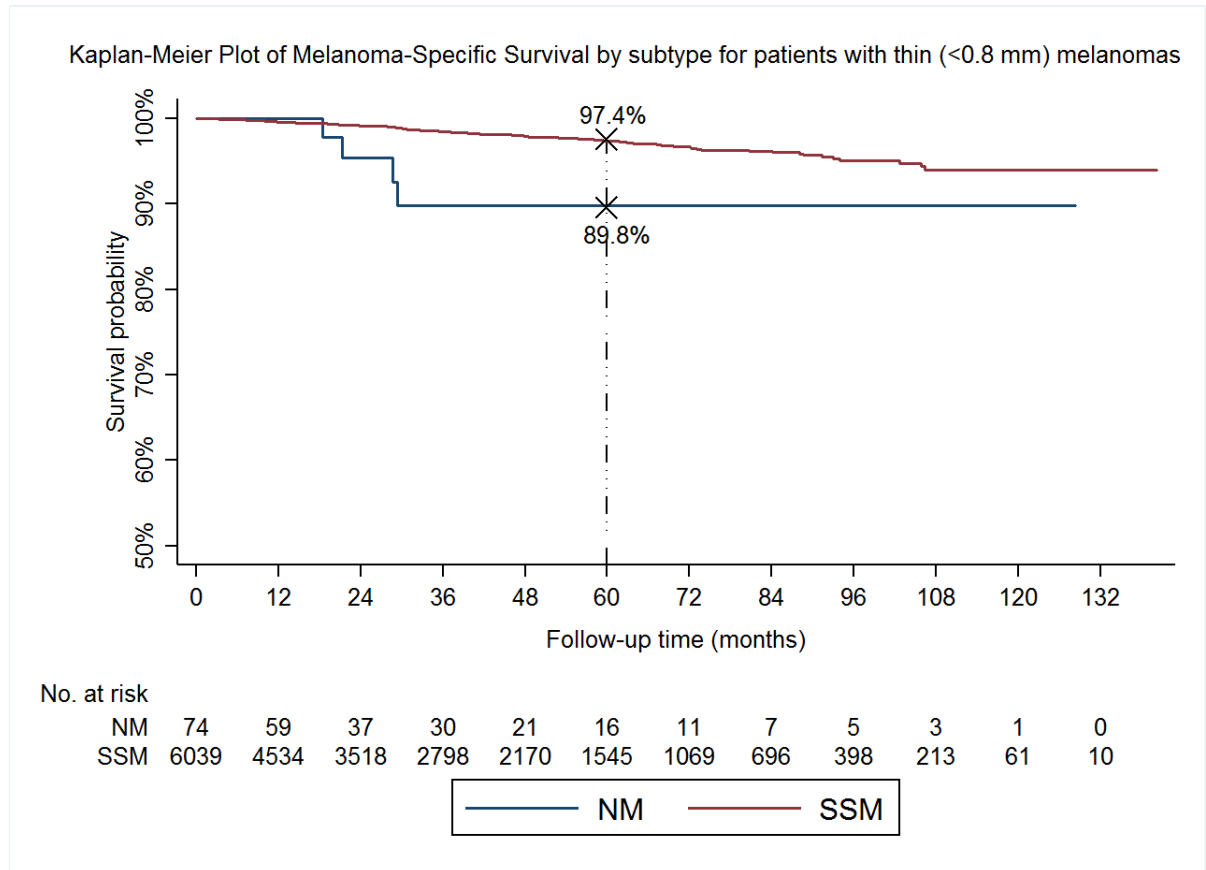

B.

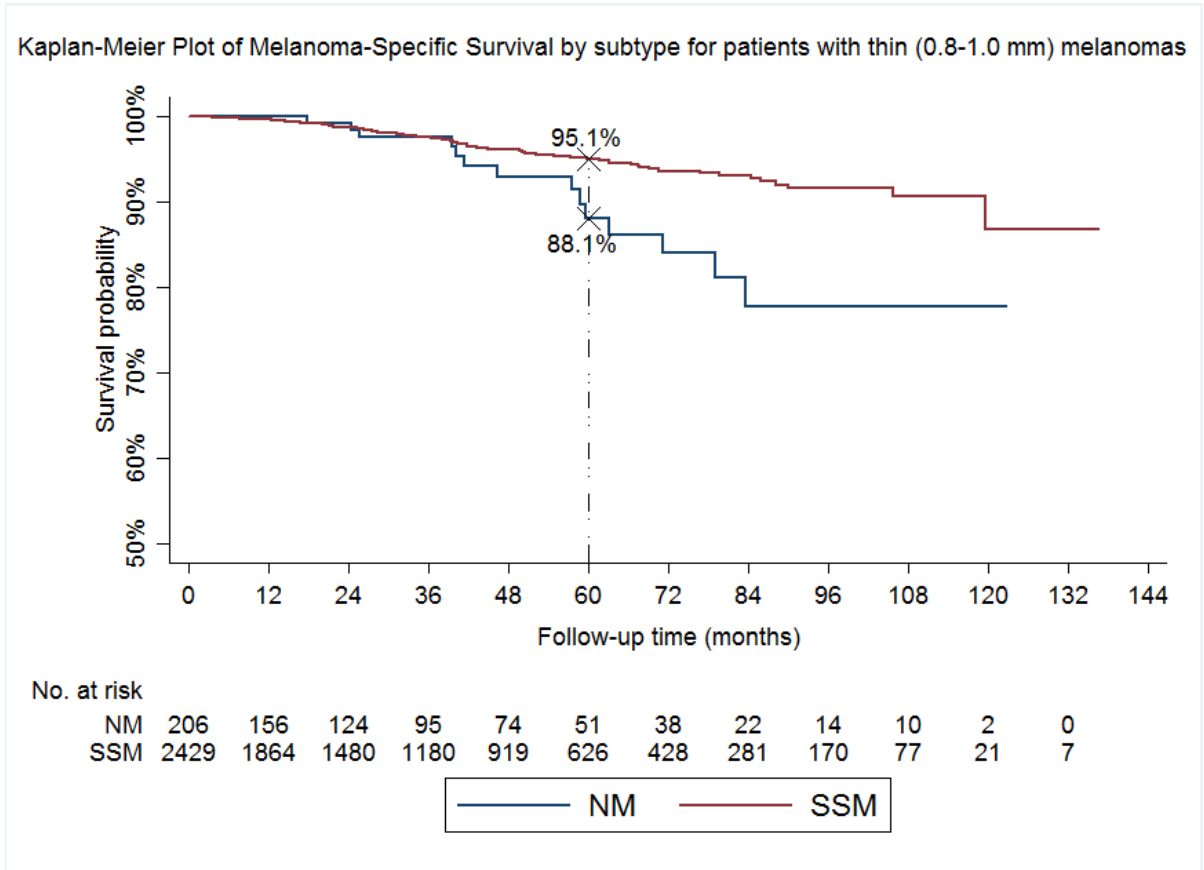

Supplement: djz034_supplementary_data.pdf [file djz034_supplementary_data.pdf]
